# Supplementary material for: Guiding teaching with assessments: high school chemistry teachers’ use of data-driven inquiry
Source: Royal Society of Chemistry journal article supplement (doi:10.1039/c4rp00188e), 2014-10-30
Supplement: c4rp00188e4.pdf [file c4rp00188e4.pdf]

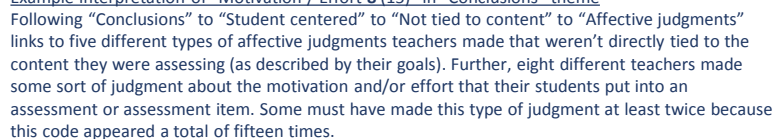

| Code                                    | S  | R  | Description                                                                                                                                                        |
|-----------------------------------------|----|----|--------------------------------------------------------------------------------------------------------------------------------------------------------------------|
| <b>Conclusions</b>                      |    |    |                                                                                                                                                                    |
| <i><u>Student centered</u></i>          |    |    |                                                                                                                                                                    |
| <i>Tied to content</i>                  |    |    |                                                                                                                                                                    |
| Compare previous to previous years      | 6  | 7  | In making an action or conclusion, the teacher may compare the results from a previous year to the current year.                                                   |
| Dichotomous agreement to goals          | 14 | 23 | The answer must be SOLELY yes/no and say nothing about actual understanding of chemistry.                                                                          |
| Difficulty of content                   | 6  | 10 | Usually in this context, conclusions about the difficulty are made because of developmental level alluded to by the age of the students.                           |
| <i>Influence of results</i>             |    |    |                                                                                                                                                                    |
| Results equivalent to conclusions       | 16 | 40 | Criteria: 1) No chemistry content is mentioned. 2) Some class-level criteria is mentioned. 3) Goals have to be centered on chemistry content.                      |
| Results with consideration of content   | 11 | 22 | This is when teachers state a conclusion as a result (i.e. "90% students got it correct"), but also include something, anything about the content being assessed.  |
| <i>Secondary content</i>                |    |    |                                                                                                                                                                    |
| Level of math proficiency               | 5  | 10 | Teachers will conclude about their students' mathematical abilities if math is required for the problem at hand.                                                   |
| Problem solving ability                 | 3  | 3  | Any conclusions made about the students' ability to solve problems.                                                                                                |
| Use of terms                            | 6  | 7  | Using the terms in chemistry correctly or general communication issues as conclusions.                                                                             |
| Units                                   | 2  | 3  | When a teacher will make a conclusion about units, but that is removed from the central idea of the assessment.                                                    |
| Writing equations / formulas            | 5  | 9  | When a teacher will make a conclusion about writing equations / balancing formulas, but that is removed from the central idea of the assessment.                   |
| <i>Understanding</i>                    |    |    |                                                                                                                                                                    |
| Concepts in mathematical application    | 9  | 17 | Any conclusion made about the students' ability to understand the concepts when they are completing a mathematical problem.                                        |
| Memorization vs. understanding          | 3  | 5  | Any conclusions that are made about memorizing content versus learning and understanding concepts.                                                                 |
| Respond correctly without understanding | 7  | 10 | These conclusions are for students that can get the problem correct (partially or entirely) and still not understand the concepts behind the problem.              |
| "Understanding" of content              | 10 | 18 | Teachers that conclude that their students generally understand the content, but it's most likely uncertain as to what that means.                                 |
| Understanding of particulate domain     | 5  | 10 | Any conclusions made about students' ability to understand the particular domain of chemistry.                                                                     |
| <i>Not tied to content</i>              |    |    |                                                                                                                                                                    |
| Environmental                           | 2  | 6  | Conclusions about school, classroom, or administrative environment.                                                                                                |
| Previous content solid                  | 3  | 6  | Conclusions about the ability of students to recall skills and knowledge that they've already covered in class.                                                    |
| Quality of classroom discussion         | 2  | 5  | Any conclusions pertaining to classroom discussion                                                                                                                 |
| <i>Student characteristics</i>          |    |    |                                                                                                                                                                    |
| Academic preparation                    | 5  | 7  | Teachers will mention that students have had or have not had previous classes that help them prepare for the current content                                       |
| Class-level ability or intelligence     | 5  | 7  | This code is specifically for the whole class' ability or perceived intelligence.                                                                                  |
| Learn from specific pedagogy            | 4  | 4  | Conclusions about student ability or likelihood to learn from a specific pedagogical strategy.                                                                     |
| Practice                                | 9  | 17 | Conclusions about the effect of practicing inside or outside of classroom on the performance on the assessment.                                                    |
| Problem type familiarity                | 1  | 2  | When a teacher concludes that students do not have the appropriate exposure to a certain type of problem.                                                          |
| SES or ELL                              | 2  | 2  | Conclusions about the effect of socio-cultural demographics on performance on the assessment.                                                                      |
| Work with other students                | 5  | 7  | Conclusions about the students' ability to work in groups or pairs in completing an activity.                                                                      |
| <i>Affective judgments</i>              |    |    |                                                                                                                                                                    |
| Carelessness                            | 1  | 1  | Anytime that a teacher makes a conclusion about the carelessness of a student or group of students.                                                                |
| Confidence                              | 5  | 7  | Any conclusions made about students' confidence.                                                                                                                   |
| Engagement / Interest                   | 6  | 6  | A conclusion about the engagement or interest level of the students.                                                                                               |
| Motivation / Effort                     | 8  | 15 | A teacher will make conclusions about students' motivation or effort put in on a particular assessment.                                                            |
| Paying attention                        | 7  | 9  | When the teacher concludes about the level of attention their students are giving.                                                                                 |
| <i><u>Teacher centered</u></i>          |    |    |                                                                                                                                                                    |
| Ability to teach specific content       | 3  | 5  | Conclusion about their own ability to teach a specific content.                                                                                                    |
| Clarity                                 | 3  | 3  | Conclusions that teachers will make about their clarity in instructions or teaching.                                                                               |
| Didaskalogenic                          | 1  | 1  | Conclusions that a teacher is causing misconceptions in their students.                                                                                            |
| Lecture                                 | 4  | 4  | Any conclusions made about lecturing and the impact of such style of teaching.                                                                                     |
| Opinion                                 | 7  | 10 | When a teacher concludes in a manner that is similar to "I like this activity" or "I think this was a good activity."                                              |
| Organization of plans                   | 2  | 2  | Any conclusions made about the organization and "well-put-togetherness" of the unit.                                                                               |
| Tied to results                         | 11 | 16 | These show a direct dependency on the student results. As an example, if a teacher says that s/he knows that if scores are low, a different approach is required.  |
| Time to teach                           | 3  | 5  | All conclusions regarding how much content teachers have to get through in a limited about of time.                                                                |
| <b>Evidence</b>                         |    |    |                                                                                                                                                                    |
| Teacher instinct / previous experience  | 9  | 14 | If a teacher uses phrases like "I just know that from my experience" or "my gut feeling is that..." to make conclusions and actions.                               |
| Conferences and workshops               | 1  | 1  | Professional development experiences that teachers cite as their source for a conclusion.                                                                          |
| <i>Classroom / School</i>               |    |    |                                                                                                                                                                    |
| Content being assessed                  | 5  | 8  | Teachers may realize that they're throwing a lot of content at their students and take this into consideration for the conclusions and actions that they make.     |
| Discussions                             | 13 | 22 | Teachers will refer to classroom discussions or whiteboarding time in making or justifying their conclusions or actions. This also includes a general "work time." |
| Timing of assessment                    | 3  | 5  | The time at which the assessment is given can impact conclusions and results, especially half days, breaks, absences, etc.                                         |
| Attendance                              | 5  | 5  | Using the attendance record of a student or group of students to make conclusions or actions.                                                                      |

| Code                                       | S  | R  | Description                                                                                                                                                                      |
|--------------------------------------------|----|----|----------------------------------------------------------------------------------------------------------------------------------------------------------------------------------|
| <u>Student(s)</u>                          |    |    |                                                                                                                                                                                  |
| <i>Academic background</i>                 |    |    |                                                                                                                                                                                  |
| English comprehension                      | 3  | 4  | Teachers will occasionally use a students' ESL status or language challenges in their conclusions or actions.                                                                    |
| Previous coursework                        | 7  | 8  | When a teacher uses evidence that is based on students' previous courses that they have or have not taken.                                                                       |
| Problem type familiarity                   | 5  | 8  | When a teacher uses evidence that the students are or are not very familiar with a certain type of problem to make a conclusion.                                                 |
| <i>Observations / Behaviors</i>            |    |    |                                                                                                                                                                                  |
| Engagement in activity                     | 3  | 3  | When teachers use the level of engagement their students have in an activity.                                                                                                    |
| General observations                       | 5  | 6  | Teachers general observations such as reading peoples' faces or making a qualitative judgment.                                                                                   |
| Independence while working                 | 4  | 7  | The teacher will say that a student's level of independence should be considered when making conclusions or justifying performance.                                              |
| Motivation                                 | 3  | 4  | The specific classroom observation of motivation and fatigue on assessment.                                                                                                      |
| Paying attention                           | 6  | 8  | When a teacher uses the level of attention that people are paying in order to make a conclusion.                                                                                 |
| <i>Performance</i>                         |    |    |                                                                                                                                                                                  |
| Performance on future assessment(s)        | 13 | 20 | Teachers that use performance on future assessments to justify conclusions made in the current assessment.                                                                       |
| Performance on previous assessment(s)      | 5  | 6  | Teachers that use previous similar assessment data to verify conclusions made in the current assessment.                                                                         |
| Practice                                   | 10 | 16 | Teachers will use the amount of time spent or the quality of the practice that they received in order to make their conclusions.                                                 |
| Previous students' performance             | 9  | 12 | The use of an individual's or previous class' overall course performance by a teacher to make conclusions or actions.                                                            |
| <b>Goals</b>                               |    |    |                                                                                                                                                                                  |
| <i>Non-assessable</i>                      |    |    |                                                                                                                                                                                  |
| Expose / Introduce content or format       | 2  | 2  | If a teacher wants to expose students to a particular format or introduce to new content.                                                                                        |
| Give unique problem                        | 1  | 2  | When a teacher wants to assign a problem because it is unique.                                                                                                                   |
| Paying attention                           | 1  | 2  | When a teacher assigns something to see whether or not the students were paying attention.                                                                                       |
| Practice                                   | 4  | 8  | This refers to the goal of having their students practice.                                                                                                                       |
| Who is doing the homework                  | 1  | 1  | When the goal of a teacher is to see who is and who is not doing the homework.                                                                                                   |
| <u>For others</u>                          |    |    |                                                                                                                                                                                  |
| External factors                           | 3  | 4  | Goals of assessment are due to lack of time, administrative pressures, test preparation, or standards.                                                                           |
| <i>Instructional</i>                       |    |    |                                                                                                                                                                                  |
| General quality of teaching                | 9  | 14 | If a teacher says that they will give an assessment to see "what they can improve" or "what they need to do next," etc.                                                          |
| Move forwards / backwards                  | 9  | 12 | This code applies to teachers who say that they use the assessments to know whether to move forward or backward with the content.                                                |
| <u>For students</u>                        |    |    |                                                                                                                                                                                  |
| Application of knowledge                   | 8  | 13 | Teachers will say that they're goal is for students to apply their knowledge to a new scenario, although "apply" could mean a range of things.                                   |
| Explicitly dichotomous                     | 8  | 11 | If a teacher uses "whether or not," "to see if they can or can't do it," as opposed to "to what degree" of understanding, learning, knowledge, or like terms.                    |
| Knowledge of fact or equation              | 10 | 25 | When a teacher seeks to gauge students knowledge about something as opposed to understanding. Linguistic.                                                                        |
| <i>Complete a skill / process</i>          |    |    |                                                                                                                                                                                  |
| Algebraic abilities                        | 2  | 3  | When the teacher specifically mentions student's algebraic capabilities as their goal for the assessment.                                                                        |
| Multiple steps to solutions                | 8  | 14 | Teachers will list the goal of their item or assessment as they want to see how well students can solve multiple-step problems, not necessarily considering accuracy of algebra. |
| Recognizing the need for equations         | 7  | 11 | If the teacher says that their goal includes either recognizes the need for or remembering a specific equation.                                                                  |
| Unit conversion                            | 5  | 6  | When a teacher will set a goal related to unit conversions in the context of another concept. If the assessment is about unit conversions, it doesn't get coded here.            |
| Writing / Balancing equations and formulas | 5  | 13 | When the teacher lists either writing or balancing equations of chemical formulas as one of their goals.                                                                         |
| <i>Analysis of goals</i>                   |    |    |                                                                                                                                                                                  |
| Assess multiple concepts                   | 28 | -  | Number of assessment items that assess multiple concepts as determined by experts (out of 43 total items, separate study).                                                       |
| Assess single concept                      | 13 | -  | Number of assessment items that assess single concept as determined by experts (out of 43 total items, separate study).                                                          |
| Specific goals                             | 23 | -  | Number of assessment items that assess specific goals as determined by experts (out of 43 total items, separate study).                                                          |
| Ambiguous goals                            | 18 | -  | Number of assessment items that assess ambiguous goals as determined by experts (out of 43 total items, separate study).                                                         |
| Not validly assessable goals               | 11 | -  | Number of assessment items where set goals are not validly assessable as determined by experts (out of 43 total items, separate study).                                          |
| <b>Actions</b>                             |    |    |                                                                                                                                                                                  |
| Favorite pedagogy                          | 1  | 1  | When a teacher wishes to teach or reteach according to their favorite or the strategy they perceive to be the most effective as the reason for their action.                     |
| Metacognitive questions                    | 5  | 7  | When the teacher asks their students why they think they got the problem incorrect or where they need help. Teachers ask students to think about where they went wrong.          |
| Similar practice problems                  | 12 | 18 | Teachers will identify a common error and as a result will want to give additional practice on that type of problem or a similar skill.                                          |
| <i>Ambiguous actions</i>                   |    |    |                                                                                                                                                                                  |
| Ambiguous                                  | 13 | 36 | Times that a teacher says that they will "reteach" or "recover" or "clarify," but do not specify how.                                                                            |
| Teach differently                          | 10 | 14 | Anytime a teacher would say that s/he is going to teach the students in a different manner than before.                                                                          |
| <i>Collaborations</i>                      |    |    |                                                                                                                                                                                  |
| Compare with other teachers                | 5  | 8  | When the teachers use collaborations with other teachers to compare performances on similar or same assessments.                                                                 |
| Additional resources                       | 8  | 11 | When teachers use other teachers or resources (chat groups, websites, list serves, books, etc.) for gaining ideas for how to teach a particular content.                         |
| <i>Reteach</i>                             |    |    |                                                                                                                                                                                  |
| Address in future years                    | 7  | 8  | Teachers identify common errors, but decide that it is not worth it or they don't have the time to go and address for the current group of students.                             |
| Exactly as previously                      | 7  | 10 | When a teacher reteaches the content in the exact similar manner as was originally taught. Exact here refers to the pedagogy strategy used.                                      |
| When it comes up in future content         | 5  | 6  | When a teacher will address shortcomings of the current content in future material.                                                                                              |
